# Supplementary material
Source: PubMed Central journal article supplement (PMC2692388)
Supplement: NIHMS106336-supplement-supplement_2.pdf [file NIHMS106336-supplement-supplement_2.pdf]

## **Legends to supplementary figures**

### **Supplementary figure 1.**

Mucosal tolerization and BrdU administration schedule. For induction of mucosal tolerance, E-selectin was instilled intranasally. For labeling of mitotic cells, BrdU was administered intraperitoneally. For cell sorting analysis, animals were euthanized 2, 4, or 7 days after surgery (A). For immunohistochemical and immunoblotting analyses, animals were euthanized 2 or 4 weeks after surgery (B).
