# Supplementary material
Source: PubMed Central journal article supplement (PMC2692388)

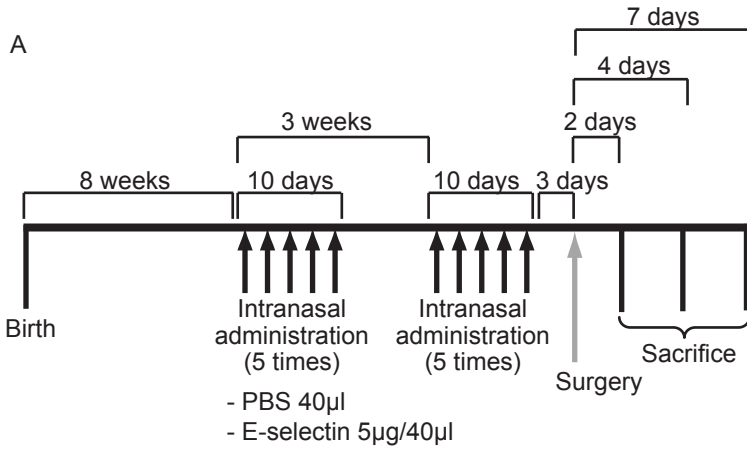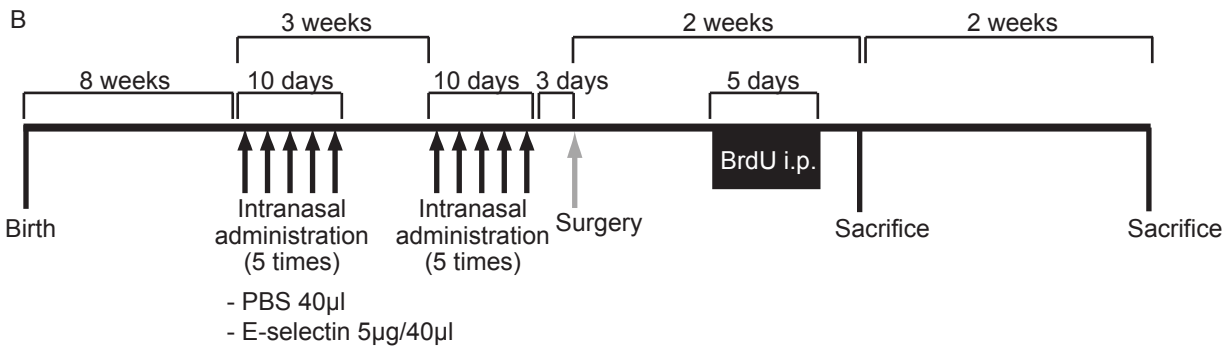

Supplement: NIHMS106336-supplement-supplement_1.pdf [file NIHMS106336-supplement-supplement_1.pdf]
